# Supplementary material for: Multiple Regression Analysis of mRNA-miRNA Associations in Colorectal Cancer Pathway
Source: Biomed Res Int. 2014 May 7;2014:676724. doi: 10.1155/2014/676724 (PMC4033420; doi:10.1155/2014/676724)
Supplement: Supplementary file 1 — Supplementary Table S1: presents a list of candidate genes frequently involved in CRC pathways and their potential targeting microRNAs. The targeting microRNAs were selected as the independent variables of the regression models based on the criterion that they are predicted by more than 3 out of the eight prediction databases. [file 676724.f1.xls]

## Sheet: Sheet1
Candidate genes frequently involved in CRC pathways and the corresponding miRNAs predicted in more than 3 out of the 8 prediction databases
mRNA	miRNAs	miRNA prediction databases
BCL2		DIANA-microT	MicroCosm-Targets	miRWalk	TargetScan	miRanda-mirSVR	miRDB	PicTar	miRecords	#
	hsa-miR-139-5p	1	1	1			1		1	5
	hsa-miR-15a	1		1		1		1	1	5
	hsa-miR-15b	1		1		1		1	1	5
	hsa-miR-16	1		1		1		1	1	5
	hsa-miR-195	1		1		1		1	1	5
	hsa-miR-204			1		1		1	1	4
	hsa-miR-211			1		1		1	1	4
	hsa-miR-23a	1		1		1			1	4
	hsa-miR-23b	1		1		1			1	4
	hsa-miR-448	1				1	1		1	4
	hsa-miR-497	1		1		1			1	4
	hsa-miR-140-3p	1		1			1		1	4
	hsa-miR-181b	1		1		1			1	4
	hsa-miR-181d	1		1		1			1	4
									1
APC		DIANA-microT	MicroCosm-Targets	miRWalk	TargetScan	miRanda-mirSVR	miRDB	PicTar	miRecords	#
	hsa-miR-132		1	1		1			1	4
	hsa-miR-135a	1		1	1	1			1	5
	hsa-miR-135b	1		1	1	1			1	5
	hsa-miR-142-3p	1	1	1		1	1		1	6
	hsa-miR-153	1				1		1	1	4
	hsa-miR-203			1		1		1	1	4
	hsa-miR-223	1		1		1			1	4
	hsa-miR-26a	1		1		1			1	4
	hsa-miR-26b	1		1		1			1	4
	hsa-miR-33b		1	1		1			1	4
	hsa-miR-376c			1		1	1		1	4
	hsa-miR-577	1		1			1		1	4
	hsa-miR-582-5p	1		1			1		1	4
	hsa-miR-944	1		1			1		1	4
BAX		DIANA-microT	MicroCosm-Targets	miRWalk	TargetScan	miRanda-mirSVR	miRDB	PicTar	miRecords	#
	hsa-miR-548a-5p		1	1	1				1	4
	hsa-miR-548b-5p		1	1	1				1	4
	hsa-miR-548c-5p		1	1	1				1	4
	hsa-miR-548d-5p		1	1	1				1	4
KRAS		DIANA-microT	MicroCosm-Targets	miRWalk	TargetScan	miRanda-mirSVR	miRDB	PicTar	miRecords	#
	hsa-miR-1	1		1		1			1	4
	hsa-miR-143	1		1		1			1	4
	hsa-miR-155	1		1	1	1			1	5
	hsa-miR-217	1		1		1	1		1	5
	hsa-miR-181d	1				1	1		1	4
	hsa-miR-206	1		1		1			1	4
	hsa-miR-384	1				1	1		1	4
	hsa-miR-543	1				1	1		1	4
	hsa-miR-548a-5p	1		1			1		1	4
	hsa-miR-548b-5p	1		1			1		1	4
	hsa-miR-548c-5p	1		1			1		1	4
	hsa-miR-548d-3p	1		1			1		1	4
	hsa-miR-548d-5p	1		1			1		1	4
	hsa-miR-577	1		1			1		1	4
	hsa-miR-590-3p	1				1	1		1	4
MLH1		DIANA-microT	MicroCosm-Targets	miRWalk	TargetScan	miRanda-mirSVR	miRDB	PicTar	miRecords	#
	hsa-miR-302a		1	1		1			1	4
	hsa-miR-302b		1	1		1			1	4
	hsa-miR-302c		1	1		1			1	4
	hsa-miR-302d		1	1		1			1	4
	hsa-miR-361-5p		1	1		1			1	4
	hsa-miR-372		1	1		1			1	4
	hsa-miR-373		1	1		1			1	4
	hsa-miR-520a-3p		1	1		1			1	4
	hsa-miR-520b		1	1		1			1	4
	hsa-miR-520c-3p		1	1		1			1	4
	hsa-miR-520d-3p		1	1		1			1	4
	hsa-miR-520e		1	1		1			1	4
	hsa-miR-892a		1	1			1		1	4
	hsa-miR-148a		1	1		1			1	4
	hsa-miR-148b		1	1		1			1	4
	hsa-miR-152		1	1		1			1	4
	hsa-miR-340		1	1		1			1	4
DCC		DIANA-microT	MicroCosm-Targets	miRWalk	TargetScan	miRanda-mirSVR	miRDB	PicTar	miRecords	#
	hsa-miR-448	1		1		1			1	4
	hsa-miR-486-5p			1		1	1		1	4
	hsa-miR-499-5p			1	1	1			1	4
	hsa-miR-570	1	1	1					1	4
	hsa-miR-9	1		1		1			1	4
SMAD2		DIANA-microT	MicroCosm-Targets	miRWalk	TargetScan	miRanda-mirSVR	miRDB	PicTar	miRecords	#
	hsa-miR-331-5p	1		1			1		1	4
	hsa-miR-361-5p	1		1			1		1	4
	hsa-miR-409-3p	1		1			1		1	4
	hsa-miR-450b-5p	1		1			1		1	4
	hsa-miR-495	1		1			1		1	4
	hsa-miR-548c-3p	1		1			1		1	4
	hsa-miR-577	1		1			1		1	4
	hsa-miR-665	1		1			1		1	4
	hsa-miR-942	1		1			1		1	4
	hsa-miR-653	1				1	1		1	4
MSH6		DIANA-microT	MicroCosm-Targets	miRWalk	TargetScan	miRanda-mirSVR	miRDB	PicTar	miRecords	#
	hsa-miR-142-5p		1		1		1		1	4
	hsa-miR-409-3p		1		1		1		1	4
TGFBR2		DIANA-microT	MicroCosm-Targets	miRWalk	TargetScan	miRanda-mirSVR	miRDB	PicTar	miRecords	#
	hsa-miR-106b	1		1		1			1	4
	hsa-miR-130a	1		1		1			1	4
	hsa-miR-130b	1		1		1			1	4
	hsa-miR-145	1		1		1			1	4
	hsa-miR-181a	1		1		1			1	4
	hsa-miR-181c	1		1		1			1	4
	hsa-miR-19a	1		1		1			1	4
	hsa-miR-19b	1		1		1			1	4
	hsa-miR-20a	1		1		1			1	4
	hsa-miR-219-5p		1	1		1			1	4
	hsa-miR-301a	1		1		1			1	4
	hsa-miR-302a	1		1		1			1	4
	hsa-miR-302b	1		1		1			1	4
	hsa-miR-302c	1		1		1			1	4
	hsa-miR-302d	1		1		1			1	4
	hsa-miR-302e			1		1	1		1	4
	hsa-miR-34c-5p		1	1		1			1	4
	hsa-miR-372	1				1	1		1	4
	hsa-miR-373	1		1		1			1	4
	hsa-miR-384	1		1		1			1	4
	hsa-miR-454	1		1		1			1	4
	hsa-miR-496			1		1	1		1	4
	hsa-miR-518a-5p	1		1			1		1	4
	hsa-miR-519b-3p	1		1			1		1	4
	hsa-miR-519c-3p	1		1			1		1	4
	hsa-miR-519d	1				1	1		1	4
	hsa-miR-520a-3p	1		1		1	1		1	5
	hsa-miR-520b	1		1		1	1		1	5
	hsa-miR-520c-3p	1		1		1	1		1	5
	hsa-miR-520d-3p	1		1		1	1		1	5
	hsa-miR-520e	1		1		1	1		1	5
	hsa-miR-301b	1		1		1	1		1	5
	hsa-miR-515-5p	1	1	1			1		1	5
	hsa-miR-9	1		1	1	1			1	5
	hsa-miR-527	1		1			1		1	4
	hsa-miR-543	1		1		1			1	4
	hsa-miR-636	1		1			1		1	4
SMAD4		DIANA-microT	MicroCosm-Targets	miRWalk	TargetScan	miRanda-mirSVR	miRDB	PicTar	miRecords	#
	hsa-miR-298	1		1			1		1	4
	hsa-miR-338-5p	1	1	1					1	4
	hsa-miR-421	1	1	1					1	4
	hsa-miR-545	1	1	1					1	4
	hsa-miR-552	1	1	1			1		1	5
	hsa-miR-567	1	1	1			1		1	5
	hsa-miR-942	1		1			1		1	4
	hsa-miR-125a-3p	1				1	1		1	4
	hsa-miR-208b		1			1	1		1	4
	hsa-miR-219-5p	1				1	1		1	4
	hsa-miR-26a	1				1		1	1	4
	hsa-miR-26b	1				1		1	1	4
	hsa-miR-34c-5p	1				1	1		1	4
	hsa-miR-495	1				1	1		1	4
	hsa-miR-590-3p	1				1	1		1	4
	hsa-miR-892b	1		1			1		1	4
TP53		DIANA-microT	MicroCosm-Targets	miRWalk	TargetScan	miRanda-mirSVR	miRDB	PicTar	miRecords	#
	hsa-let-7a	1		1		1			1	4
	hsa-let-7b	1		1		1			1	4
	hsa-let-7c	1		1		1			1	4
	hsa-let-7e	1		1		1			1	4
	hsa-let-7f	1		1		1			1	4
	hsa-let-7g	1		1		1			1	4
	hsa-let-7i	1		1		1			1	4
	hsa-miR-143		1	1		1			1	4
	hsa-miR-150		1	1	1	1			1	5
	hsa-miR-300		1	1		1	1		1	5
	hsa-miR-19b		1	1		1			1	4
	hsa-miR-381			1		1	1		1	4
	hsa-miR-876-3p		1	1			1		1	4
	hsa-miR-98	1		1		1			1	4
MSH2		DIANA-microT	MicroCosm-Targets	miRWalk	TargetScan	miRanda-mirSVR	miRDB	PicTar	miRecords	#
	hsa-miR-205	1	1	1		1			1	5
	hsa-miR-21	1	1	1	1	1			1	6
	hsa-miR-590-5p		1	1	1	1	1		1	6
	hsa-miR-548c-3p		1	1			1		1	4
	hsa-miR-559		1	1			1		1	4
	hsa-miR-889	1	1	1					1	4
	hsa-miR-132		1	1		1			1	4
	hsa-miR-137		1	1		1			1	4
	hsa-miR-212		1	1		1			1	4
	hsa-miR-340		1	1		1			1	4
	hsa-miR-410	1		1		1			1	4
Note: '1' means that the miRNA is predicted in the database; '#' refers to the total number of prediction databases that predict the miRNA. The miRNAs highlighted in green color are further selected from more than 4 databases for analysis.
